1 **Title:** An Infant Sleep Electroencephalographic Marker of Thalamocortical Connectivity Predicts  
2 Behavioral Outcome in Late Infancy

3

4 **Authors**

5 Valeria Jaramillo <sup>1-5</sup> \*, Sarah F. Schoch <sup>1,6,7</sup> \*, Andjela Markovic <sup>1,8</sup>, Malcolm Kohler <sup>1,6</sup>, Reto Huber  
6 <sup>2,3,6,9</sup>, Caroline Lustenberger <sup>6,10</sup>, Salome Kurth <sup>1,6,8+</sup>

7

8 \* These authors contributed equally

9

10 + Corresponding author: Salome Kurth, University of Fribourg, Department of Psychology, Rue P.-A.-  
11 de-Faucigny 2, CH-1700 Fribourg, salome.kurth@unifr.ch

12

- 13 1) Department of Pulmonology, University Hospital Zurich, Zurich, CH
- 14 2) Child Development Center, University Children's Hospital Zurich, Zurich, CH
- 15 3) Children's Research Center, University Children's Hospital Zurich, University of Zurich  
16 (UZH), Zürich, Switzerland
- 17 4) Surrey Sleep Research Centre, Faculty of Health and Medical Sciences, University of  
18 Surrey, Guildford, United Kingdom
- 19 5) Neuromodulation Laboratory, School of Psychology, University of Surrey, Guildford,  
20 United Kingdom
- 21 6) Center of Competence Sleep & Health Zurich, University of Zurich, Zurich, CH
- 22 7) Donders Institute for Brain, Cognition and Behaviour, Radboud University Medical Centre,  
23 Nijmegen, NL
- 24 8) Department of Psychology, University of Fribourg, Fribourg, CH
- 25 9) Department of Child and Adolescent Psychiatry and Psychotherapy, Psychiatric Hospital,  
26 University of Zurich, CH
- 27 10) Neural Control of Movement Lab, Institute of Human Movement Sciences and Sport,  
28 Department of Health Sciences and Technology, ETH Zurich, 8092 Zurich, Switzerland

29

30

31

32

33

34

35

1 **Abstract**

2 Infancy represents a critical period during which thalamocortical brain connections develop and  
3 mature. Deviations in the maturation of thalamocortical connectivity are linked to neurodevelopmental  
4 disorders. There is a lack of early biomarkers to detect and localize neuromaturational deviations,  
5 which can be overcome with mapping through high-density electroencephalography (hdEEG)  
6 assessed in sleep. Specifically, slow waves and spindles in non-rapid eye movement (NREM) sleep  
7 are generated by the thalamocortical system, and their characteristics, slow wave slope and spindle  
8 density, are closely related to neuroplasticity and learning. Recent studies further suggest that  
9 information processing during sleep underlying sleep-dependent learning is promoted by the temporal  
10 coupling of slow waves and spindles, yet slow wave-spindle coupling remains unexplored in infancy.  
11 Thus, we evaluated three potential biomarkers: 1) slow wave slope, 2) spindle density, and 3) the  
12 temporal coupling of slow waves with spindles. We use hdEEG to first examine the occurrence and  
13 spatial distribution of these three EEG features in healthy infants and second to evaluate a predictive  
14 relationship with later behavioral outcomes. We report four key findings: First, infants' EEG features  
15 appear locally: slow wave slope is maximal in occipital and frontal areas, whereas spindle density is  
16 most pronounced frontocentrally. Second, slow waves and spindles are temporally coupled in infancy,  
17 with maximal coupling strength in the occipital areas of the brain. Third, slow wave slope, spindle  
18 density, and slow wave-spindle coupling are not associated with concurrent behavioral status (6  
19 months). Fourth, spindle density in central and frontocentral regions at age 6 months predicts later  
20 behavioral outcomes at 12 and 24 months. Neither slow wave slope nor slow wave-spindle coupling  
21 predict behavioral development. Our results propose spindle density as an early EEG biomarker for  
22 identifying thalamocortical maturation, which can potentially be used for early diagnosis of  
23 neurodevelopmental disorders in infants. These findings are complemented by our companion paper  
24 that demonstrates the linkage of spindle density to infant nighttime movement, framing the possible  
25 role of spindles in sensorimotor microcircuitry development. Together, our studies suggest that early  
26 sleep habits, thalamocortical maturation, and behavioral outcome are closely interwoven. A crucial  
27 next step will be to evaluate whether early therapeutic interventions may be effective to reverse  
28 deviations in identified individuals at risk.

29

30 **Highlights:**

- 31 • Slow waves and spindles occur in a temporally coupled manner in infancy
- 32 • Slow wave slope, spindle density, and slow wave-spindle coupling are not related to  
33 concurrent behavioral development
- 34 • Spindle density at 6 months predicts behavioral status at 12 and 24 months
- 35 • Slow wave slope and slow wave-spindle coupling are not predictive of behavioral  
36 development

37

38

39 **Keywords:** high-density EEG, development, infancy, biomarkers, thalamocortical connectivity, slow  
40 wave slope, spindle density, coupling

1

2

## 1           **1. Introduction**

2   The thalamus and cortex are connected by neurons that integrate sensory and motor signals, thereby  
3   regulating consciousness and alertness (Halassa and Kastner, 2017). Thalamocortical connections  
4   are altered in many neurodevelopmental disorders, e.g., autism spectrum disorder (Nair et al., 2013;  
5   Woodward et al., 2017) or attention-deficit/hyperactivity disorder (Mills et al., 2012; Muthuraman et al.,  
6   2019). However, several questions remain on how thalamocortical connections emerge. Previously, it  
7   was shown that they are established in the last trimester of pregnancy (Kostović and Judas, 2010)  
8   and undergo major modifications across the first 2-3 months after birth (Murata and Colonnese,  
9   2019). In this early critical period, the thalamocortical system is vulnerable to environmental influences  
10   (Kostović et al., 2014; McQuillen and Ferriero, 2005). Very preterm birth, as well as low birth weight,  
11   could reinforce neurodevelopmental deficits (Brydges et al., 2018; Franz et al., 2018; Pascal et al.,  
12   2018). Early therapeutic interventions are most effective to reduce later burden - both developmentally  
13   and economically - however, there is a lack of neurophysiological biomarkers to identify infants at  
14   increased risk for later behavioral problems. As thalamocortical connections are established  
15   ante partum or shortly after birth, alterations underlying neurodevelopmental disorders are likely to  
16   originate during early infancy. Since most disorders are not diagnosed until school-age (Bachmann et  
17   al., 2017; Brett et al., 2016; Sheldrick et al., 2017), there is an unmet need for the early recognition of  
18   infants at risk of developing behavioral disorders. Since thalamocortical connectivity may still be  
19   modifiable during infancy and early childhood such biomarkers could allow timely therapeutic  
20   intervention.

21   Thalamocortical connectivity is quantified with Diffusion Tensor Imaging and functional Magnetic  
22   Resonance Imaging (Alcauter et al., 2014; Gilmore et al., 2018). Infants, however, require anesthesia  
23   to undergo these procedures, which bears certain risks (McCann and Soriano, 2019). High-density  
24   electroencephalography (hdEEG) has emerged as a new imaging modality that offers an excellent  
25   temporal and high spatial resolution. It offers a non-invasive, cost-efficient, safe, and mobile  
26   alternative suited for infants due to a low number of movement artefacts, a lack of motivational  
27   confounders, and the possibility of at-home recordings (Lustenberger and Huber, 2012). Slow waves  
28   (large-amplitude oscillations of 0.5-2.0 Hz) and spindles (waxing and waning oscillations of 11.0-16.0  
29   Hz) are the most prominent oscillatory features (Berry et al., 2017) in EEG recordings of non-rapid  
30   eye movement (NREM) sleep and emerge in the first months of life (Jenni et al., 2004). Both  
31   oscillations are generated by thalamocortical mechanisms based on two distinct networks of thalamic  
32   substructures (Gent et al., 2018).

33   Slow waves and spindles not only reflect thalamocortical connectivity but are potentially involved in  
34   synaptic plasticity dynamics. Not only the magnitude but also the spatial distribution of slow waves  
35   and spindles modulate experience-dependent plasticity, which was demonstrated in sleep-dependent  
36   performance improvement in numerous studies (Rasch and Born, 2013; Tononi and Cirelli, 2014).  
37   Importantly, slow waves and spindles are thought to actively contribute to the maturation of the  
38   thalamocortical network by promoting synaptic remodeling (Huber and Born, 2014). In support of this,  
39   neurodevelopmental changes are mirrored by changes in the topographical distribution of slow waves.

1 The region displaying maximal slow wave activity (SWA, EEG power in respective frequency range)  
2 shifts from occipital to frontal from early childhood to adolescence, paralleled by changes in cortical  
3 gray matter volume and the maturation of behavioral abilities (Kurth et al., 2012). Over the past  
4 decade, insights were rapidly growing and demonstrate that sleep topography can locally pinpoint  
5 plastic processes in pediatric and adolescent disease (Ringli et al., 2013; Tesler et al., 2016). Further,  
6 the concept has been put forward that children's sleep EEG features actively promote the  
7 neurophysiological processes underlying brain development (reviewed in (Timofeev et al., 2020)). In  
8 line with this, early sleep problems have been linked to poor behavioral and cognitive outcomes  
9 (Gregory et al., 2009; Mindell et al., 2017; Simola et al., 2014). In addition, our companion paper  
10 (PLACEHOLDER REFERENCE), further demonstrates that behavioral sleep habits are intertwined  
11 with neurophysiological sleep EEG features in infants: slow wave activity is related to daytime  
12 napping, whereas spindle density is associated with nighttime movements and awakenings. This  
13 supports the proposed concept that spindles play a role in sensorimotor microcircuitry development  
14 (Fernandez and Lüthi, 2020; Sokoloff et al., 2021). Thus, likely slow waves and spindles not only may  
15 serve as early biomarkers for altered thalamocortical connectivity, they are possibly furthermore  
16 crucial players in the sleep-dependent plasticity processes underlying neurodevelopmental changes.

17 Three slow wave and spindle features might be of particular interest as neurodevelopmental markers  
18 considering these have been linked to synaptic plasticity. 1) The slope of slow waves reflects synaptic  
19 strength within the thalamocortical system (Esser et al., 2007; Riedner et al., 2007; Vyazovskiy et al.,  
20 2007) and undergoes strong maturational changes (Jaramillo et al., 2020). 2) Spindle density (number  
21 of spindles per minute) has been connected to thalamocortical connectivity and integrity assessed  
22 with structural (Piantoni et al., 2013; Wehrle et al., 2020) and functional Magnetic Resonance Imaging  
23 (Baran et al., 2019). Spindle density is often assessed separately for slow (11.0-13.0 Hz) and fast  
24 (13.5-16.0 Hz) spindles, which display diverse spatial distributions on the scalp and likely serve  
25 distinct functions (De Gennaro and Ferrara, 2003; Lustenberger et al., 2015; Mölle et al., 2011). 3)  
26 Recent observations suggest that the temporal coupling of slow waves with spindles is essential for  
27 coordinated information processing in brain networks during sleep - and thus a fundamental  
28 underpinning to memory formation (Hahn et al., 2020; Helfrich et al., 2019). In line with the concept  
29 that performance improvement is sleep-dependent (Rasch and Born, 2013), slow wave-spindle  
30 coupling is an off-line reactivation process in which newly learnt material is incorporated with pre-  
31 existing information. Thus, the slow wave slope, spindle density (for slow and fast spindles), and the  
32 temporal coupling between slow waves and spindles are promising candidate biomarkers for  
33 thalamocortical system integrity and maturation in infants.

34 There is limited research on the slow wave slope, spindle density, and slow wave-spindle coupling  
35 during the period of early brain development. While the topographical maturation of the slow wave  
36 slope and spindle density is understudied in infancy, it is to date entirely unknown whether slow  
37 waves and spindles even occur in a temporally coupled manner in infancy. Further, it is unknown  
38 whether and how the three EEG features relate to concurrent behavioral development. Finally, it is  
39 unknown whether the three EEG features predict behavioral development in a longitudinal manner.

1 In the present study, we evaluate three EEG features as potential biomarkers for infant behavioral  
2 development: the slow wave slope, spindle density, and the temporal coupling of slow waves and  
3 spindles. Specifically, we tested if these markers 1) are measurable in infants and occur in region-  
4 specific patterns on the scalp, 2) are associated with concurrent behavioral status at age 6 months,  
5 and 3) predict behavioral outcome at ages 12 and 24 months. We therefore analyzed hdEEG from  
6 sleep of 32 healthy infants at age 6 months and longitudinal behavioral outcomes at ages 6, 12, and  
7 24 months. In addition, behavioral status was assessed at age 3 months to test whether resulting  
8 associations were driven by earlier behavioral status.

## 9 10 **2. Methods**

### 11 *2.1 Participants*

12 Parents with infants enrolled in a study tracking infants' sleep behavior (Schoch et al., 2021, 2020)  
13 were asked to participate in additional at-home hdEEG assessments. 24 (of the previously enrolled  
14 152) families agreed to participate, and 11 families were newly recruited. Inclusion criteria were: good  
15 general health, being primarily breastfed at the time of inclusion, vaginal birth, and birth within 37-43  
16 weeks of gestation. Exclusion criteria were: birth weight below 2500 g, intake of medication affecting  
17 the sleep-wake cycle, or antibiotics intake before the first behavioral assessment, disorders of the  
18 central nervous system, acute pediatric disorders, brain damage, chronic diseases, family background  
19 of narcolepsy, psychosis, or bipolar disorder. The study was approved by the cantonal ethics  
20 committee (BASEC 2016-00730) and study procedures adhered to the declaration of Helsinki. Written  
21 informed consent was obtained from the infants' parents prior to study participation after explaining  
22 the study protocol. Two infants were unable to fall asleep during the recording, resulting in 33 sleep  
23 EEG datasets.

### 24 *2.2 Behavioral Development*

25 Behavioral developmental status was assessed longitudinally at infants' ages of 3 (N = 21), 6 (N =  
26 31), 12 (N = 22), and 24 (N = 27) months using the age-appropriate Ages and Stages Questionnaire  
27 (ASQ) completed by the parents (Squires et al., 1995). To quantify overall developmental status, a  
28 Collective Score was calculated as the sum of all five subdomains (Communication, Gross Motor,  
29 Fine Motor, Problem Solving, and Personal Social). In addition, the subdomains Gross Motor and  
30 Personal Social were analyzed independently considering that 1) they correlate with the well-validated  
31 testing battery Bayley Scales of Infant Development (Gollenberg et al., 2010) and 2) are most  
32 indicative of a developmental delay (Valla et al., 2015). The Gross Motor Score assesses how infants  
33 use their arms, legs, and other large muscles for sitting, crawling, walking, running, and other  
34 activities. An example item at 12 months is "Does your baby stand up in the middle of the floor by  
35 himself/herself and take several steps forward?". The Personal Social Score measures infants' self-  
36 help skills and interactions with others. An example item at 12 months is "Does your baby roll or throw  
37 a ball back to you so that you can return it to him?". Possible answers are "yes", "sometimes", and  
38 "not yet".

### 1 2.3 High-density sleep EEG

2 At age 6 months, infants' sleep was measured at home using hdEEG. The recording was scheduled  
3 to commence at their habitual night bedtimes and lasted up to two hours. A hdEEG sponge net (124  
4 electrodes, Electrical Geodesics Sensor Net, Electrical Geodesics Inc., EGI, Eugene, OR) was  
5 soaked in electrolyte water (1 l) containing potassium chloride (10 ml) and baby shampoo for 5  
6 minutes before application to the head. After adjusting the net to the vertex (Cz), impedances were  
7 lowered to below 50 k $\Omega$ . During the recording, the signal was referenced to Cz, band-pass filtered  
8 (0.01 - 200 Hz), and sampled at 500 Hz. Afterwards, EEG data was band-pass filtered (0.5 - 50 Hz)  
9 and downsampled to 128 Hz. Sleep stages were scored visually in 20-second epochs by two  
10 independent raters according to the AASM Manual for scoring sleep (Berry et al., 2017).  
11 Disagreements were discussed for final scoring. Epochs containing artefacts were rejected by visual  
12 inspection and a semi-automatic approach based on power thresholds in the frequency bands 0.75 -  
13 4.5 and 20 - 30 Hz (Huber et al., 2000). Channels placed below the ears or with poor data quality  
14 were removed. If infants exhibited less than 30 minutes of artefact-free NREM sleep, additional  
15 channels (max. 10 %) with a low percentage of good epochs were removed, resulting in the inclusion  
16 of 74 - 109 electrode channels ( $100.5 \pm 7.5$  number of electrodes; Mean  $\pm$  SD). Sleep EEG features  
17 (slow wave slope, spindle density, slow wave-spindle coupling) were determined for data in the first  
18 30 minutes of artefact-free NREM sleep, except for three participants for whom only 25, 26.3, and 28  
19 minutes were available. One participant with only 13.7 minutes was excluded leading to a final  
20 inclusion of 32 participants in the analysis. Missing electrodes were interpolated after EEG feature  
21 calculation using spheric linear interpolation resulting in values for all 109 electrodes.

### 22 2.4 Slow wave slope

23 Slow waves were detected using a procedure adapted from (Jaramillo et al., 2020; Riedner et al.,  
24 2007): After low-pass filtering below 30 Hz, the signal was re-referenced to the average across all  
25 electrodes and band-pass filtered (0.5 - 4 Hz, stopband 0.1 and 10 Hz, Chebyshev Type II filter).  
26 Negative deflections with a duration of 0.25 to 1.0 seconds were detected as slow waves. Slow waves  
27 with a smaller or larger amplitude than the 1st or the 99th amplitude percentile, respectively, were  
28 excluded to minimize artefacts. For remaining slow waves, their amplitude was defined as the most  
29 negative peak of the signal within the negative half-wave. The slope was defined as amplitude divided  
30 by the duration from the most negative peak to the second zero crossing. The amplitude-corrected  
31 slope<sub>55</sub>, which is thought to be most reflective of infant thalamocortical network strength, was  
32 determined as in Fattinger et al. (2014): a linear regression between the identified slope and  
33 amplitude was computed for each electrode and each participant. Based on the regression  
34 parameters, the slope of slow waves with an amplitude of 55  $\mu$ V was identified, which we termed  
35 slope<sub>55</sub>.

## 1 *2.5 Spindle Density*

2 Spindles were detected using a procedure adapted from (Ferrarelli et al., 2007; Gerstenberg et al.,  
3 2020): After low-pass filtering below 40 Hz and re-referencing to the average across all electrodes,  
4 the signal was band-pass filtered (10 - 16 Hz, stopband 6 and 30 Hz, Chebyshev Type II filter) and  
5 rectified. Whenever the signal exceeded an upper threshold of 5-fold the mean signal amplitude, a  
6 spindle was detected. Mean signal amplitude was based on the entire analyzed time period in each  
7 participant. The time points before and after the peak amplitude in which the signal dropped below the  
8 lower threshold of 2-fold the mean signal amplitude were defined as the start and end of the spindle.  
9 Spindles below 11 Hz and with a duration below 500 ms were excluded. Spindle density was defined  
10 as the number of spindles detected per minute. Because this algorithm had not been applied to 6-  
11 month-old infants in the past, spindle detection was validated by visual spindle inspection in a  
12 randomly selected data segment from a participant: 4 independent raters detected spindles in a data  
13 interval of 10 minutes NREM sleep revealing a sensitivity (1-N missing/ N detected spindles) of  $94.2 \pm$   
14  $4.4 \%$  and a specificity (1-N wrong/ N detected spindles) of  $79.3 \pm 11.7 \%$  ( $M \pm SD$  across 4 raters).  
15 Further, our algorithm quality was underlined by the agreement of spindle density with a study in  
16 which spindles were visually detected in 6-month-old infants (Scholle et al., 2007). Because different  
17 functions in learning and plasticity have been suggested for slow (11-13 Hz) and fast (13.5-16 Hz)  
18 spindles (De Gennaro and Ferrara, 2003; Lustenberger et al., 2015; Mölle et al., 2011), spindle  
19 density was evaluated separately in the slow and fast spindle frequency range.

## 20 *2.6 Slow wave - spindle coupling*

21 Slow wave-spindle co-occurrence and coupling were determined using a procedure adapted from  
22 (Hahn et al., 2020; Helfrich et al., 2018): Only slow waves with amplitudes exceeding the 75th  
23 amplitude percentile were included to increase the signal-to-noise ratio. The co-occurrence rate of  
24 slow waves and spindles represented the number of slow waves with negative peaks occurring 2.5  
25 seconds directly before or after a spindle peak, divided by the total number of detected spindles in  
26 percent. This co-occurrence rate does not directly reflect slow wave-spindle coupling but quantifies  
27 the percentage of detected spindles concomitant with detected slow waves. Event-locked time-  
28 frequency representations were calculated for slow wave negative peak-locked time segments  
29 (Hanning window, -2 to 2 s in 50 ms steps, 4 to 40 Hz, 0.2 Hz steps). Power values were calculated  
30 as relative change to a baseline calculated as the mean power across the entire time segment. To  
31 avoid inversion of signal polarity, this analysis was performed with an occipital electrode (O1), as slow  
32 wave amplitude was highest in the occipital cortex (data not shown). Slow wave-spindle coupling was  
33 assessed for each electrode by band-pass filtering the signal in the slow wave frequency range (0.5 -  
34 4 Hz, stopband 0.1 and 10 Hz, Chebyshev Type II filter) and subsequently extracting the phase angle  
35 of the spindle amplitude peak using a Hilbert transform. The coupling strength was determined as the  
36 resultant vector length across all events by using the CircStat Toolbox function `circ_r` (Berens, 2009).  
37 This value ranges from 0 to 1 and quantifies the circular spread, with a score of 1 when spindles  
38 consistently occur at the exact same phase of the slow wave, and 0 in case spindles occur evenly  
39 distributed across all phases.



1    2.7 *Statistical Analysis*

2    Relationships between slow and fast spindles and sleep EEG markers and behavioral scores were  
3    assessed using electrode-wise Spearman correlations with statistical non-parametric cluster  
4    correction (Nichols and Holmes, 2002) as previously applied in hdEEG studies (Page et al., 2018). In  
5    short, the order of one of the two correlation variables was shuffled randomly, and a Spearman  
6    correlation was calculated for each electrode. The maximal number of neighboring electrodes with a  
7    rho-value above the critical threshold was determined separately for positive and negative rho-values.  
8    5000 permutations were performed to obtain a distribution of maximal cluster sizes for positive and  
9    negative rho-values, and the threshold for both distributions was set to the 97.5<sup>th</sup> percentile.  
10   Generalized linear models were used to assess whether relationships in identified electrode clusters  
11   remained significant when correcting for the exact age at the EEG assessment (exact age) and sex  
12   using the R package stats. Data was loaded into R with the package openxlsx. The significance level  
13   was set to 0.05. All analyses were performed using R or Matlab.

14   2.8 *Data and code availability statements*

15   Data and code are available upon request to the authors, pending ethical approval, and in alignment  
16   with consenting framework.

17

18

### 1        3. Results

#### 2        3.1 Slope55 and spindle density show diverse distributions across the scalp in infants

3        First, we examined the topographical distribution of the slope55 of slow waves and slow and fast  
4        spindle density at age 6 months. Slope55 showed a predominant occipital and a secondary frontal  
5        maximum (Figure 1A). In contrast, both slow and fast spindle density were highest in a large  
6        frontocentral area (Figure 1B). Due to the similar topography of slow and fast spindle density, we  
7        tested whether these were linked (electrode-wise Spearman correlation) (Suppl. Figure 1). Indeed, we  
8        found a significant negative relationship across the frontocentral area (72 electrodes) in which both  
9        slow and fast spindles predominated, *i.e.*, participants with a lower density of slow spindles exhibited  
10       a higher density of fast spindles. Because of this strong linkage between fast and slow spindles, we  
11       restricted subsequent analyses to fast spindles only.

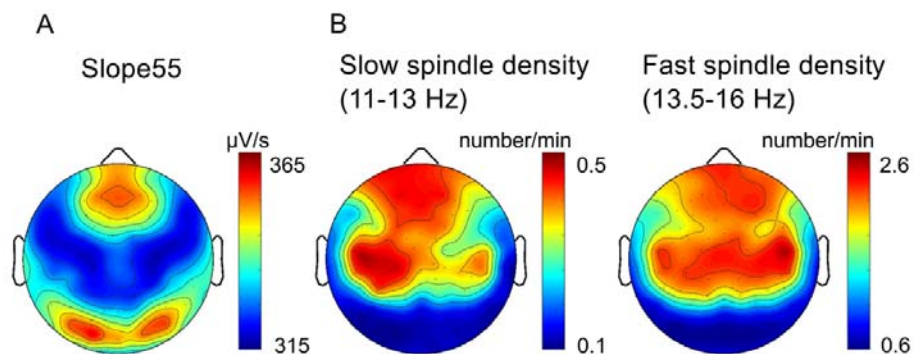

12        Figure 1. Topographical distribution of slope55 and spindle density in 6-month-old infants. Values are  
13        averaged across all infants ( $N = 32$ ). Color-coding indicates maximal (red) and minimal (blue) values.  
14        (A) Topographical distribution of slope55. (B) Topographical distribution of spindle density for slow  
15        (11-13 Hz) and fast (13.5 - 16 Hz) spindles.  
16        (C) Topographical distribution of fast spindle density.

17

#### 18        3.2 Slow waves and spindles are temporally coupled in infants

19        Second, we quantified the co-occurrence of slow waves and spindles (slow and fast). The co-  
20        occurrence rate was  $62.9 \pm 17.5$  % for the occipital electrode O1. To further evaluate the interaction  
21        between slow wave phase and spindle activity, we computed time-frequency representations time-  
22        locked to the negative slow wave peak (Figure 2A). The alternating pattern with increased spindle  
23        power during the 'up-phase' and decreased power during the 'down-phase' of the slow wave indicated  
24        modulation of spindle activity by the slow wave phase. Interestingly, higher frequencies (20-40 Hz)  
25        seemed also to be modulated by the slow wave phase, as indicated by an increase before the 'down-  
26        phase' and a suppression thereafter. Quantifying the coupling strength between slow waves and  
27        spindles for each electrode revealed maximal coupling strength in the occipital area (Figure 2B).

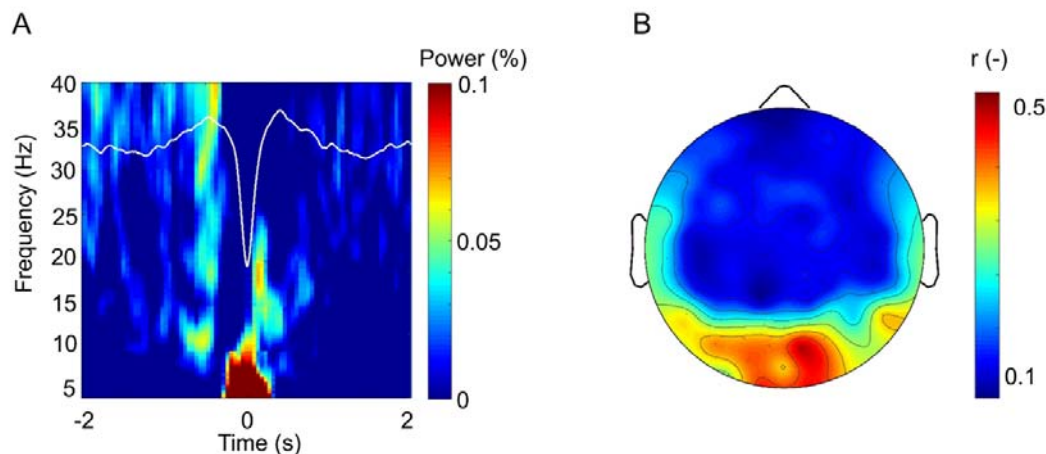

1

2 Figure 2. Temporal coupling of slow waves and spindles in 6-month-old infants. (A) Slow wave  
3 negative peak time-locked time-frequency representation for electrode O1 averaged across all infants  
4 except one for whom this electrode was excluded due to poor quality (N = 31). The average slow  
5 wave is superimposed in white. (B) Topographical distribution of the coupling strength (resultant  
6 vector length) between slow waves and spindles. Values are averaged across all infants (N = 32).  
7 Color-coding indicates maximal (red) and minimal (blue) values.

8

### 9 *3.3 EEG features are not related to behavioral development at age 6 months*

10 Subsequently, we tested whether slope55, fast spindle density, or the coupling strength between slow  
11 waves and spindles assessed at age 6 months are associated with behavioral development at the  
12 same age. Electrode-wise Spearman correlations revealed no significant relationship between any of  
13 the sleep EEG markers, neither with the developmental status overall (Collective Score) nor the  
14 domains of specific developmental interest (Gross Motor or Personal Social Scores) (Suppl. Figure 2).  
15 Thus, the three EEG features are not linked to concurrent behavioral development.

### 16 *3.4 Fast spindle density predicts later behavioral development*

17 Lastly, we evaluated whether slope55, fast spindle density, or the coupling strength between slow  
18 waves and spindles at age 6 months predict behavioral development at ages 12 and 24 months.  
19 Indeed, we observed predictive relationships: infants with increased fast spindle density at 6 months  
20 showed higher Collective Scores and Gross Motor Scores at 12 months and increased Gross Motor  
21 Scores at 24 months (Figure 3). These associations were located in a central region at age 12 months  
22 and in a more widespread frontocentral region at age 24 months. To test whether these relationships  
23 remain when correcting for exact age and sex, we calculated generalized linear models (respective  
24 developmental score as dependent variable, spindle density averaged across all significant cluster  
25 electrodes, exact age, and sex as predictors). The relationships remained significant for the Collective  
26 Score at 12 months ( $t(18) = 2.38$ ,  $p = 0.029$ ) and the Gross Motor Score at 24 months ( $t(24) = 2.33$ ,  $p$   
27  $= 0.029$ ). The Gross Motor score at 12 months remained at trend-level in the corrected model ( $t(18) =$

1 1.78,  $p = 0.093$ ). No predictive relationship was found between fast spindle density and the Personal  
2 Social Score, nor between slope55 or the slow wave-spindle coupling strength and developmental  
3 scores (Suppl. Figures 3 & 4). Finally, we explored a relationship in the reverse direction, *i.e.*, testing  
4 whether behavioral development at age 3 months drives fast spindle density at age 6 months. We  
5 found no significant relationship between the developmental scores at 3 months and fast spindle  
6 density at 6 months (Suppl. Figure 5). In other words, while EEG features (*i.e.*, fast spindle density)  
7 predict behavioral development several months later, EEG features are not determined by prior  
8 behavioral status in infancy.  
9

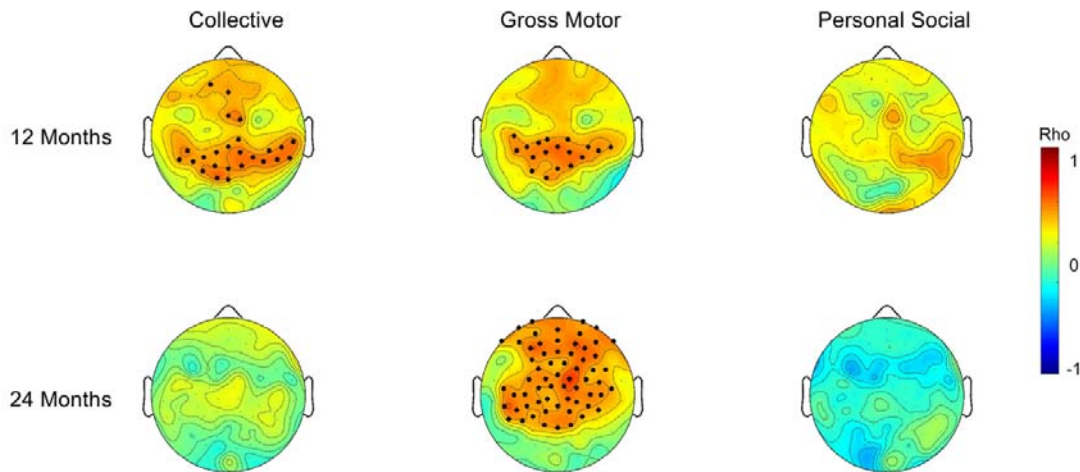

10  
11 Figure 3. EEG prediction maps for infant behavioral development: Predictive relationships between  
12 fast spindle density at age 6 months and behavioral developmental scores at age 12 ( $N = 22$ ) and 24  
13 ( $N = 27$ ) months. Data are color-coded in the topographical representation of Spearman correlation  
14 coefficients and scaled to maxima (red) and minima (blue). Significant electrodes are indicated with  
15 black dots ( $p < 0.05$ , statistical non-parametric cluster-corrected).  
16

17

#### 17 4. Discussion

18 This study evaluated three non-invasive EEG markers of thalamocortical connectivity as predictors for  
19 behavioral development in infancy: slope55, spindle density, and slow wave-spindle coupling.  
20 Nighttime hdEEG of 6-month-olds and behavioral data at ages 3, 6, 12, and 24 months were  
21 analyzed. We report 4 key findings: First, slope55 and spindle density show distinct topographical  
22 maps. Second, slow waves are temporally coupled to spindles already in infancy. Third, slope55,  
23 spindle density, and the temporal coupling between slow waves and spindles are not associated with  
24 concurrent behavioral development at age 6 months. Fourth, spindle density predicts later behavioral  
25 status. In contrast, neither slope55 nor slow wave-spindle coupling were predictive of later behavioral  
26 status. Our findings demonstrate that specific sleep EEG markers in early infancy might represent  
27 promising biomarkers for later behavioral outcomes and could non-invasively identify infants at risk for  
28 later thalamocortical-based disorders.

1 This study confirms topographical differences in the distribution of slope55 with an occipital  
2 predominance and a secondary frontal maximum. While the occipital maximum aligns with a prior  
3 report in 6-month-olds (Fattering et al., 2014), the frontal maximum is a new discovery revealed by  
4 hdEEG. The widespread frontocentral maximum we report for spindle density is consistent with  
5 observations in slightly older children, *i.e.*, 12-30 month-old infants/toddlers (Page et al., 2018). We  
6 observed similar topographies for slow (11-13 Hz) and fast (13.5-16 Hz) spindles with a negative  
7 correlation between these features. This result is in line with studies showing correlations in opposite  
8 directions for slow and fast spindles with behavior in adults (Lustenberger et al., 2015) and further  
9 highlights the importance of this subdivision already during infancy. Thus, our research uncovers that  
10 both slope55 and spindle density of healthy infants show a local distribution across the scalp, which is  
11 only uncovered with high spatial resolution EEG.

12 The second novel finding is that slow waves and spindles occur temporally coupled in 6-month-old  
13 infants. This reinforces the concept that slow wave-spindle coupling represents an inherent feature of  
14 the sleep EEG, as previously shown in children, adolescents, and adults (Hahn et al., 2020; Helfrich  
15 et al., 2018). However, this is the first study to provide evidence for the presence of temporal coupling  
16 in early infancy. This is exciting, considering that temporal coupling is thought to promote learning and  
17 plasticity during sleep (Hahn et al., 2020; Helfrich et al., 2019). Most interestingly, we localized the  
18 strongest coupling in an occipital area that generally shows the earliest cortical maturation (Gogtay et  
19 al., 2004; Shaw et al., 2008). We thus conclude that slow wave-spindle coupling is already present in  
20 early infancy with potential implications for early learning and brain maturation mechanisms.

21 We did not find associations between the EEG features and concurrent behavioral developmental  
22 scores at age 6 months. In contrast to previous studies investigating relationships between EEG  
23 power and behavioral development in infants (Guyer et al., 2019; Page et al., 2018; Satomaa et al.,  
24 2020) the primary focus of our study was EEG features linked to thalamocortical network connectivity  
25 and integrity. The absence of a relationship between slope55, fast spindle density, and slow wave-  
26 spindle coupling to concurrent behavior indicates that even though differences in thalamocortical  
27 connectivity may exist at 6 months, these are not yet mirrored in the infant's behavior. This novel  
28 finding reinforces the need for early biomarkers of thalamocortical deviation.

29 We identified a predictive relationship between fast spindle density at 6 months and overall  
30 developmental status at 12 months, and motor skills at 24 months. This association was observed  
31 over central and frontocentral regions, coinciding with the location displaying maximal spindle density.  
32 This result aligns with previous reports that sleep spindles play a role in motor aspects of learning and  
33 memory (Lustenberger et al., 2016; Morin et al., 2008). This finding further supports fast spindle  
34 density in frontal/central regions as a potential early biomarker for later behavioral development. This  
35 is in line with research showing reduced frontal fast sigma activity in infants/toddlers with autism  
36 spectrum disorder (Page et al., 2020) and a reduced frontal density of fast compared to slow spindles  
37 in children with attention-deficit/hyperactivity disorder (Ruiz-Herrera et al., 2021). Although our  
38 observation is correlative, the fact that there was no concurrent relationship at 6 months (nor a  
39 reverse relationship of developmental status at 3 months with spindle density at 6 months) suggests  
40 that sleep spindles might be involved in long-term processes of thalamocortical network maturation.

1 Interestingly, this process might involve brief muscle contractions - so-called myoclonic twitching. A  
2 recent study demonstrated that myoclonic twitches, which are thought to promote thalamocortical  
3 development through sensorimotor feedback loops, are concomitant with spindles in infants (Sokoloff  
4 et al., 2021). This hypothesis is further supported by the findings outlined in our companion paper  
5 demonstrating that an infant's spindle density correlates with nighttime movement (PLACEHOLDER  
6 REFERENCE). Given an active contribution of sleep spindles in thalamocortical network maturation,  
7 sleep spindle modulation using novel non-invasive tools such as auditory closed-loop stimulation (Ngo  
8 et al., 2013) or transcranial alternating current stimulation (Lustenberger et al., 2016) might represent  
9 a feasible early therapeutic intervention to protect infants at risk from adverse outcomes.

10 In contrast to spindle density, neither slope55 nor the slow wave-spindle temporal coupling was  
11 predictive for later behavioral status. Although the slow wave slope is closely linked to synaptic  
12 strength and a reduction has been shown in pediatric patients with impaired synaptic plasticity  
13 (Gefferie et al., 2021) and after thalamic stroke (Jaramillo et al., 2021), our results provide no  
14 evidence for its suitability as an early biomarker for later behavioral status. This is the first study to  
15 report relationships between slow wave-spindle coupling and behavioral development in infants, yet  
16 the functional significance of this coupling remains to be established in future experiments that may  
17 include cognition and memory tasks.

18 In sum, from the three evaluated sleep EEG markers, we here identified fast spindle density as a  
19 potential early biomarker for behavioral maturation and as a possible diagnostic tool to identify  
20 individuals at risk for later behavioral or cognitive difficulties.

21 This study included healthy infants only. A more heterogeneous study group could unravel additional  
22 relationships. Furthermore, we performed statistical non-parametric cluster correction to account for  
23 multiple comparisons across the electrodes (as is common in hdEEG studies, e.g., (Page et al.,  
24 2018)), yet not accounting for the number of statistical tests. We can thus not entirely exclude false  
25 positive results. However, this seems negligible because the effects were localized to where spindle  
26 density was maximal and included the behavioral domains as expected from the literature. Validation  
27 with an independent study group would overcome this limitation.

28 In conclusion, our study demonstrates that slope55, spindle density, and the temporal coupling of  
29 slow waves and spindles can be quantified in healthy infants. Moreover, it reveals topographical  
30 differences in their occurrence. We further report that fast spindles can predict later behavioral  
31 developmental status, especially in the motor domain. We thus propose fast spindles as a potential  
32 biomarker to identify thalamocortical maturation and possibly deviations therein in infants. Next steps  
33 may include multi-modal assessments of hdEEG with Magnetic Resonance Imaging to unravel  
34 anatomical thalamocortical underpinnings of infant spindles as done in children, adolescents, and  
35 adults (Baran et al., 2019; Piantoni et al., 2013; Wehrle et al., 2020). Further, fast spindle density  
36 should be implemented in large-scale clinical routine examinations to streamline detection criteria for  
37 later behavioral diagnosis. Individuals at risk may thus be identified early, which is essential to  
38 translate these findings into targeted therapeutic interventions.

39

1           **5. Acknowledgments & Funding**

2    The authors thank the parents and infants for participating in this study. This work was supported by  
3    the University of Zurich (Clinical Research Priority Program “Sleep and Health”, Forschungskredit FK-  
4    18-047, Faculty of Medicine), the Swiss National Science Foundation (SNSF, PCEFP1-181279,  
5    P0ZHP1-178697, PZ00P3\_179795, P2ZHP1\_195248, P2EZF3\_199918), Foundation for Research in  
6    Science and the Humanities (STWF-17-008), and the Olga Mayenfisch Stiftung. The funding sources  
7    exerted no involvement in study design, collection, analysis, and interpretation of data, writing of the  
8    report, or decision to submit the article for publication.

9

10           **6. Declarations of interest**

11    Declarations of interest: None. R.H. is a partner of Tosoo AG, a company developing wearables for  
12    sleep electrophysiology monitoring and stimulation.

13

14           **7. CRediT roles**

15    **Valeria Jaramillo:** Conceptualization; Formal analysis; Funding acquisition; Methodology; Software;  
16    Validation; Visualization; Roles/Writing - original draft; Writing - review & editing. **Sarah F. Schoch:**  
17    Conceptualization; Data curation; Formal analysis; Funding acquisition; Investigation; Methodology;  
18    Project administration; Software; Validation; Roles/Writing - original draft; Writing - review & editing.  
19    **Andjela Markovic:** Formal analysis; Methodology; Software; Writing - review & editing. **Malcolm**  
20    **Kohler:** Conceptualization; Resources; Writing - review & editing. **Reto Huber:** Conceptualization;  
21    Methodology; Resources; Software; Supervision; Writing - review & editing. **Caroline Lustenberger:**  
22    Conceptualization; Methodology; Supervision; Writing - review & editing. **Salome Kurth:**  
23    Conceptualization; Formal analysis; Funding acquisition; Investigation; Methodology; Software;  
24    Roles/Writing - original draft; Writing - review & editing.

25

26

1        **8. References**

- 2        Alcauter, S., Lin, W., Smith, J.K., Short, S.J., Goldman, B.D., Reznick, J.S., Gilmore, J.H., Gao, W.,  
3        2014. Development of thalamocortical connectivity during infancy and its cognitive correlations.  
4        *J. Neurosci.* 34, 9067–9075. <https://doi.org/10.1523/JNEUROSCI.0796-14.2014>
- 5        Bachmann, C.J., Philipsen, A., Hoffmann, F., 2017. ADHD in Germany: Trends in Diagnosis and  
6        Pharmacotherapy. *Dtsch. Arztebl. Int.* 114, 141–148. <https://doi.org/10.3238/arztebl.2017.0141>
- 7        Baran, B., Karahanoğlu, F.I., Mylonas, D., Demanuele, C., Vangel, M., Stickgold, R., Anticevic, A.,  
8        Manoach, D.S., 2019. Increased Thalamocortical Connectivity in Schizophrenia Correlates With  
9        Sleep Spindle Deficits: Evidence for a Common Pathophysiology. *Biol. psychiatry. Cogn.*  
10        *Neurosci. neuroimaging* 4, 706–714. <https://doi.org/10.1016/j.bpsc.2019.04.012>
- 11        Berens, P., 2009. CircStat: A MATLAB Toolbox for Circular Statistics. *J. Stat. Softw.* 31, 1–21.  
12        <https://doi.org/10.18637/jss.v031.i10>
- 13        Berry, R.B., Brooks, R., Gamaldo, C., Harding, S.M., Lloyd, R.M., Quan, S.F., Troester, M.T., Vaughn,  
14        B. V., 2017. AASM Scoring Manual Updates for 2017 (Version 2.4). *J. Clin. Sleep Med.* 13, 665–  
15        666. <https://doi.org/10.5664/jcsm.6576>
- 16        Brett, D., Warnell, F., McConachie, H., Parr, J.R., 2016. Factors Affecting Age at ASD Diagnosis in  
17        UK: No Evidence that Diagnosis Age has Decreased Between 2004 and 2014. *J. Autism Dev.*  
18        *Disord.* 46, 1974–1984. <https://doi.org/10.1007/s10803-016-2716-6>
- 19        Brydges, C.R., Landes, J.K., Reid, C.L., Campbell, C., French, N., Anderson, M., 2018. Cognitive  
20        outcomes in children and adolescents born very preterm: a meta-analysis. *Dev. Med. Child*  
21        *Neurol.* 60, 452–468. <https://doi.org/10.1111/dmcn.13685>
- 22        De Gennaro, L., Ferrara, M., 2003. Sleep spindles: an overview. *Sleep Med. Rev.* 7, 423–440.  
23        <https://doi.org/10.1053/smr.2002.0252>
- 24        Esser, S.K., Hill, S.L., Tononi, G., 2007. Sleep homeostasis and cortical synchronization: I. Modeling  
25        the effects of synaptic strength on sleep slow waves. *Sleep* 30, 1617–30.
- 26        Fattinger, S., Jenni, O.G., Schmitt, B., Achermann, P., Huber, R., 2014. Overnight Changes in the  
27        Slope of Sleep Slow Waves during Infancy. *Sleep* 37, 245–253.  
28        <https://doi.org/10.5665/sleep.3390>
- 29        Fernandez, L.M.J., Lüthi, A., 2020. Sleep Spindles: Mechanisms and Functions. *Physiol. Rev.* 100,  
30        805–868. <https://doi.org/10.1152/physrev.00042.2018>
- 31        Ferrarelli, F., Huber, R., Peterson, M.J., Massimini, M., Murphy, M., Riedner, B.A., Watson, A., Bria,  
32        P., Tononi, G., 2007. Reduced Sleep Spindle Activity in Schizophrenia Patients. *Am. J.*  
33        *Psychiatry* 164, 483–492. <https://doi.org/10.1176/ajp.2007.164.3.483>
- 34        Franz, A.P., Bolat, G.U., Bolat, H., Matijasevich, A., Santos, I.S., Silveira, R.C., Procianoy, R.S.,  
35        Rohde, L.A., Moreira-Maia, C.R., 2018. Attention-Deficit/Hyperactivity Disorder and Very  
36        Preterm/Very Low Birth Weight: A Meta-analysis. *Pediatrics* 141.  
37        <https://doi.org/10.1542/peds.2017-1645>
- 38        Gefferie, S.R., Maric, A., Critelli, H., Gueden, S., Kurlemann, G., Kurth, S., Nosadini, M., Plecko, B.,  
39        Ringli, M., Rostásy, K., Sartori, S., Schmitt, B., Suppiej, A., Van Bogaert, P., Wehrle, F.M.,  
40        Huber, R., Bölsterli, B.K., 2021. Altered EEG markers of synaptic plasticity in a human model of



- 1 NMDA receptor deficiency: Anti-NMDA receptor encephalitis. *Neuroimage* 239, 118281.  
2 <https://doi.org/10.1016/j.neuroimage.2021.118281>
- 3 Gent, T.C., Bassetti, C.L.A., Adamantidis, A.R., 2018. Sleep-wake control and the thalamus. *Curr.*  
4 *Opin. Neurobiol.* 52, 188–197. <https://doi.org/10.1016/j.conb.2018.08.002>
- 5 Gerstenberg, M., Furrer, M., Tesler, N., Franscini, M., Walitza, S., Huber, R., 2020. Reduced sleep  
6 spindle density in adolescent patients with early-onset schizophrenia compared to major  
7 depressive disorder and healthy controls. *Schizophr. Res.* 221, 20–28.  
8 <https://doi.org/10.1016/j.schres.2019.11.060>
- 9 Gilmore, J.H., Knickmeyer, R.C., Gao, W., 2018. Imaging structural and functional brain development  
10 in early childhood. *Nat. Rev. Neurosci.* 19, 123–137. <https://doi.org/10.1038/nrn.2018.1>
- 11 Gogtay, N., Giedd, J.N., Lusk, L., Hayashi, K.M., Greenstein, D., Vaituzis, A.C., Nugent, T.F.,  
12 Herman, D.H., Clasen, L.S., Toga, A.W., Rapoport, J.L., Thompson, P.M., 2004. Mapping  
13 adolescent brain change reveals dynamic wave of accelerated gray matter loss in very early-  
14 onset schizophrenia. *PNAS* 98, 11650–11655. <https://doi.org/10.1073/pnas.201243998>
- 15 Gollenberg, A.L., Lynch, C.D., Jackson, L.W., McGuinness, B.M., Msall, M.E., 2010. Concurrent  
16 validity of the parent-completed Ages and Stages Questionnaires, 2nd Ed. with the Bayley  
17 Scales of Infant Development II in a low-risk sample. *Child. Care. Health Dev.* 36, 485–490.  
18 <https://doi.org/10.1111/j.1365-2214.2009.01041.x>
- 19 Gregory, A.M., Caspi, A., Moffitt, T.E., Poulton, R., 2009. Sleep problems in childhood predict  
20 neuropsychological functioning in adolescence. *Pediatrics* 123, 1171–1176.  
21 <https://doi.org/10.1542/peds.2008-0825>
- 22 Guyer, C., Werner, H., Wehrle, F., Bölsterli, B.K., Hagmann, C., Jenni, O.G., Huber, R., 2019. Brain  
23 maturation in the first 3 months of life, measured by electroencephalogram: A comparison  
24 between preterm and term-born infants. *Clin. Neurophysiol. Off. J. Int. Fed. Clin. Neurophysiol.*  
25 130, 1859–1868. <https://doi.org/10.1016/j.clinph.2019.06.230>
- 26 Hahn, M.A., Heib, D., Schabus, M., Hoedlmoser, K., Helfrich, R.F., 2020. Slow oscillation-spindle  
27 coupling predicts enhanced memory formation from childhood to adolescence. *Elife* 9.  
28 <https://doi.org/10.7554/eLife.53730>
- 29 Halassa, M.M., Kastner, S., 2017. Thalamic functions in distributed cognitive control. *Nat. Neurosci.*  
30 20, 1669–1679. <https://doi.org/10.1038/s41593-017-0020-1>
- 31 Helfrich, R.F., Lendner, J.D., Mander, B.A., Guillen, H., Paff, M., Mnatsakanyan, L., Vadera, S.,  
32 Walker, M.P., Lin, J.J., Knight, R.T., 2019. Bidirectional prefrontal-hippocampal dynamics  
33 organize information transfer during sleep in humans. *Nat. Commun.* 10, 3572.  
34 <https://doi.org/10.1038/s41467-019-11444-x>
- 35 Helfrich, R.F., Mander, B.A., Jagust, W.J., Knight, R.T., Walker, M.P., 2018. Old Brains Come  
36 Uncoupled in Sleep: Slow Wave-Spindle Synchrony, Brain Atrophy, and Forgetting. *Neuron* 97,  
37 221–230.e4. <https://doi.org/10.1016/j.neuron.2017.11.020>
- 38 Huber, R., Born, J., 2014. Sleep, synaptic connectivity, and hippocampal memory during early  
39 development. *Trends Cogn. Sci.* 18, 141–52. <https://doi.org/10.1016/j.tics.2013.12.005>
- 40 Huber, R., Graf, T., Cote, K.A., Wittmann, L., Gallmann, E., Matter, D., Schuderer, J., Kuster, N.,

- 1 Borbély, A.A., Achermann, P., 2000. Exposure to pulsed high-frequency electromagnetic field  
2 during waking affects human sleep EEG. *Neuroreport* 11, 3321–5.
- 3 Jaramillo, V., Jendoubi, J., Maric, A., Mensen, A., Heyse, N.C., Eberhard-Moscicka, A.K., Wiest, R.,  
4 Bassetti, C.L.A., Huber, R., 2021. Thalamic Influence on Slow Wave Slope Renormalization  
5 During Sleep. *Ann. Neurol.* <https://doi.org/10.1002/ana.26217>
- 6 Jaramillo, V., Volk, C., Maric, A., Furrer, M., Fattinger, S., Kurth, S., Lustenberger, C., Huber, R.,  
7 2020. Characterization of overnight slow-wave slope changes across development in an age-,  
8 amplitude-, and region-dependent manner. *Sleep.* <https://doi.org/10.1093/sleep/zsaa038>
- 9 Jenni, O.G., Borbély, A.A., Achermann, P., 2004. Development of the nocturnal sleep  
10 electroencephalogram in human infants. *Am. J. Physiol. Regul. Integr. Comp. Physiol.* 286,  
11 R528-38. <https://doi.org/10.1152/ajpregu.00503.2003>
- 12 Kostović, I., Judas, M., 2010. The development of the subplate and thalamocortical connections in the  
13 human foetal brain. *Acta Paediatr.* 99, 1119–1127. <https://doi.org/10.1111/j.1651->  
14 [2227.2010.01811.x](https://doi.org/10.1111/j.1651-2227.2010.01811.x)
- 15 Kostović, I., Kostović-Srzić, M., Benjak, V., Jovanov-Milošević, N., Radoš, M., 2014.  
16 Developmental dynamics of radial vulnerability in the cerebral compartments in preterm infants  
17 and neonates. *Front. Neurol.* 5, 139. <https://doi.org/10.3389/fneur.2014.00139>
- 18 Kurth, S., Ringli, M., Lebourgeois, M.K., Geiger, A., Buchmann, A., Jenni, O.G., Huber, R., 2012.  
19 Mapping the electrophysiological marker of sleep depth reveals skill maturation in children and  
20 adolescents. *Neuroimage* 63, 959–965. <https://doi.org/10.1016/j.neuroimage.2012.03.053>
- 21 Lustenberger, C., Boyle, M.R., Alagapan, S., Mellin, J.M., Vaughn, B. V., Fröhlich, F., 2016. Feedback-  
22 Controlled Transcranial Alternating Current Stimulation Reveals a Functional Role of Sleep  
23 Spindles in Motor Memory Consolidation. *Curr. Biol.* 26, 2127–36.  
24 <https://doi.org/10.1016/j.cub.2016.06.044>
- 25 Lustenberger, C., Huber, R., 2012. High density electroencephalography in sleep research: potential,  
26 problems, future perspective. *Front. Neurol.* 3, 77. <https://doi.org/10.3389/fneur.2012.00077>
- 27 Lustenberger, C., Wehrle, F., Tüshaus, L., Achermann, P., Huber, R., 2015. The Multidimensional  
28 Aspects of Sleep Spindles and Their Relationship to Word-Pair Memory Consolidation. *Sleep*  
29 38, 1093–103. <https://doi.org/10.5665/sleep.4820>
- 30 McCann, M.E., Soriano, S.G., 2019. Does general anesthesia affect neurodevelopment in infants and  
31 children? *BMJ* 367, l6459. <https://doi.org/10.1136/bmj.l6459>
- 32 McQuillen, P.S., Ferriero, D.M., 2005. Perinatal subplate neuron injury: implications for cortical  
33 development and plasticity. *Brain Pathol.* 15, 250–260. <https://doi.org/10.1111/j.1750->  
34 [3639.2005.tb00528.x](https://doi.org/10.1111/j.1750-3639.2005.tb00528.x)
- 35 Mills, K.L., Bathula, D., Dias, T.G.C., Iyer, S.P., Fenesy, M.C., Musser, E.D., Stevens, C.A., Thurlow,  
36 B.L., Carpenter, S.D., Nagel, B.J., Nigg, J.T., Fair, D.A., 2012. Altered cortico-striatal-thalamic  
37 connectivity in relation to spatial working memory capacity in children with ADHD. *Front.*  
38 *psychiatry* 3, 2. <https://doi.org/10.3389/fpsy.2012.00002>
- 39 Mindell, J.A., Leichman, E.S., DuMond, C., Sadeh, A., 2017. Sleep and Social-Emotional  
40 Development in Infants and Toddlers. *J. Clin. child Adolesc. Psychol. Off. J. Soc. Clin. Child*

- 1       Adolesc. Psychol. Am. Psychol. Assoc. Div. 53 46, 236–246.  
2       <https://doi.org/10.1080/15374416.2016.1188701>
- 3       Mölle, M., Bergmann, T.O., Marshall, L., Born, J., 2011. Fast and slow spindles during the sleep slow  
4       oscillation: disparate coalescence and engagement in memory processing. *Sleep* 34, 1411–  
5       1421. <https://doi.org/10.5665/SLEEP.1290>
- 6       Morin, A., Doyon, J., Dostie, V., Barakat, M., Hadj Tahar, A., Korman, M., Benali, H., Karni, A.,  
7       Ungerleider, L.G., Carrier, J., 2008. Motor sequence learning increases sleep spindles and fast  
8       frequencies in post-training sleep. *Sleep* 31, 1149–1156.
- 9       Murata, Y., Colonnese, M.T., 2019. Thalamic inhibitory circuits and network activity development.  
10       *Brain Res.* 1706, 13–23. <https://doi.org/10.1016/j.brainres.2018.10.024>
- 11       Muthuraman, M., Moliadze, V., Boecher, L., Siemann, J., Freitag, C.M., Groppa, S., Siniatchkin, M.,  
12       2019. Multimodal alterations of directed connectivity profiles in patients with attention-  
13       deficit/hyperactivity disorders. *Sci. Rep.* 9, 20028. <https://doi.org/10.1038/s41598-019-56398-8>
- 14       Nair, A., Treiber, J.M., Shukla, D.K., Shih, P., Müller, R.-A., 2013. Impaired thalamocortical  
15       connectivity in autism spectrum disorder: a study of functional and anatomical connectivity. *Brain*  
16       136, 1942–1955. <https://doi.org/10.1093/brain/awt079>
- 17       Ngo, H.-V. V, Martinetz, T., Born, J., Mölle, M., 2013. Auditory closed-loop stimulation of the sleep  
18       slow oscillation enhances memory. *Neuron* 78, 545–53.  
19       <https://doi.org/10.1016/j.neuron.2013.03.006>
- 20       Nichols, T.E., Holmes, A.P., 2002. Nonparametric permutation tests for functional neuroimaging: A  
21       primer with examples. *Hum. Brain Mapp.* 15, 1–25. <https://doi.org/10.1002/hbm.1058>
- 22       Page, J., Lustenberger, C., Fröhlich, F., 2020. Nonrapid eye movement sleep and risk for autism  
23       spectrum disorder in early development: A topographical electroencephalogram pilot study.  
24       *Brain Behav.* 10, e01557. <https://doi.org/10.1002/brb3.1557>
- 25       Page, J., Lustenberger, C., Fröhlich, F., 2018. Social, motor, and cognitive development through the  
26       lens of sleep network dynamics in infants and toddlers between 12 and 30 months of age. *Sleep*  
27       41. <https://doi.org/10.1093/sleep/zsy024>
- 28       Pascal, A., Govaert, P., Oostra, A., Naulaers, G., Ortibus, E., Van den Broeck, C., 2018.  
29       Neurodevelopmental outcome in very preterm and very-low-birthweight infants born over the  
30       past decade: a meta-analytic review. *Dev. Med. Child Neurol.* 60, 342–355.  
31       <https://doi.org/10.1111/dmcn.13675>
- 32       Piantoni, G., Poil, S.-S., Linkenkaer-Hansen, K., Verweij, I.M., Ramautar, J.R., Van Someren, E.J.W.,  
33       Van Der Werf, Y.D., 2013. Individual differences in white matter diffusion affect sleep  
34       oscillations. *J. Neurosci.* 33, 227–233. <https://doi.org/10.1523/JNEUROSCI.2030-12.2013>
- 35       Rasch, B., Born, J., 2013. About Sleep's Role in Memory. *Physiol. Rev.* 93, 681–766.  
36       <https://doi.org/10.1152/physrev.00032.2012>
- 37       Riedner, B.A., Vyazovskiy, V. V, Huber, R., Massimini, M., Esser, S., Murphy, M., Tononi, G., 2007.  
38       Sleep homeostasis and cortical synchronization: III. A high-density EEG study of sleep slow  
39       waves in humans. *Sleep* 30, 1643–57.
- 40       Ringli, M., Souissi, S., Kurth, S., Brandeis, D., Jenni, O.G., Huber, R., 2013. Topography of sleep slow

- 1 wave activity in children with attention-deficit/hyperactivity disorder. *Cortex*. 49, 340–7.  
2 <https://doi.org/10.1016/j.cortex.2012.07.007>
- 3 Ruiz-Herrera, N., Cellini, N., Prehn-Kristensen, A., Guillén-Riquelme, A., Buela-Casal, G., 2021.  
4 Characteristics of sleep spindles in school-aged children with attention-deficit/hyperactivity  
5 disorder. *Res. Dev. Disabil.* 112, 103896. <https://doi.org/10.1016/j.ridd.2021.103896>
- 6 Satomaa, A.-L., Mäkelä, T., Saarenpää-Heikkilä, O., Kylliäinen, A., Huupponen, E., Himanen, S.-L.,  
7 2020. Slow-wave activity and sigma activities are associated with psychomotor development at 8  
8 months of age. *Sleep* 43. <https://doi.org/10.1093/sleep/zsaa061>
- 9 Schoch, S.F., Castro-Meija, J.L., Krych, L., Kot, W., Leng, B., Kohler, M., Huber, R., Rogler, G.,  
10 Biedermann, L., Walser, J.C., Nielsen, D.S., Kurth, S., 2021. From Alpha Diversity to ZZZ:  
11 Exploring associations among sleep, gut bacteria and behavioral development in infancy. *OSF*  
12 *Prepr.*
- 13 Schoch, S.F., Huber, R., Kohler, M., Kurth, S., 2020. Which are the Central Aspects of Infant Sleep?  
14 The Dynamics of Sleep Composites across Infancy. *Sensors* 20, 7188.
- 15 Scholle, S., Zwacka, G., Scholle, H.C., 2007. Sleep spindle evolution from infancy to adolescence.  
16 *Clin. Neurophysiol. Off. J. Int. Fed. Clin. Neurophysiol.* 118, 1525–1531.  
17 <https://doi.org/10.1016/j.clinph.2007.03.007>
- 18 Shaw, P., Kabani, N.J., Lerch, J.P., Eckstrand, K., Lenroot, R., Gogtay, N., Greenstein, D., Clasen, L.,  
19 Evans, A., Rapoport, J.L., Giedd, J.N., Wise, S.P., 2008. Neurodevelopmental trajectories of the  
20 human cerebral cortex. *J. Neurosci.* 28, 3586–94. [https://doi.org/10.1523/JNEUROSCI.5309-](https://doi.org/10.1523/JNEUROSCI.5309-07.2008)  
21 [07.2008](https://doi.org/10.1523/JNEUROSCI.5309-07.2008)
- 22 Sheldrick, R.C., Maye, M.P., Carter, A.S., 2017. Age at First Identification of Autism Spectrum  
23 Disorder: An Analysis of Two US Surveys. *J. Am. Acad. Child Adolesc. Psychiatry* 56, 313–320.  
24 <https://doi.org/10.1016/j.jaac.2017.01.012>
- 25 Simola, P., Liukkonen, K., Pitkäranta, A., Pirinen, T., Aronen, E.T., 2014. Psychosocial and somatic  
26 outcomes of sleep problems in children: a 4-year follow-up study. *Child. Care. Health Dev.* 40,  
27 60–67. <https://doi.org/10.1111/j.1365-2214.2012.01412.x>
- 28 Sokoloff, G., Dooley, J.C., Glanz, R.M., Wen, R.Y., Hickerson, M.M., Evans, L.G., Laughlin, H.M.,  
29 Apfelbaum, K.S., Blumberg, M.S., 2021. Twitches emerge postnatally during quiet sleep in  
30 human infants and are synchronized with sleep spindles. *Curr. Biol.* 31, 3426–3432.e4.  
31 <https://doi.org/10.1016/j.cub.2021.05.038>
- 32 Squires, J., Potter, L., Bricker, D., 1995. *The ASQ User's Guide for the Ages & Stages*  
33 *Questionnaires: A Parent-Completed, Child-Monitoring System.* Paul H Brookes Publishing.
- 34 Tesler, N., Gerstenberg, M., Franscini, M., Jenni, O.G., Walitza, S., Huber, R., 2016. Increased frontal  
35 sleep slow wave activity in adolescents with major depression. *NeuroImage. Clin.* 10, 250–6.  
36 <https://doi.org/10.1016/j.nicl.2015.10.014>
- 37 Timofeev, I., Schoch, S.F., LeBourgeois, M.K., Huber, R., Riedner, B.A., Kurth, S., 2020. Spatio-  
38 temporal properties of sleep slow waves and implications for development. *Curr. Opin. Physiol.*  
39 15, 172–182. <https://doi.org/10.1016/j.cophys.2020.01.007>
- 40 Tononi, G., Cirelli, C., 2014. Sleep and the price of plasticity: from synaptic and cellular homeostasis

- 1 to memory consolidation and integration. *Neuron* 81, 12–34.  
2 <https://doi.org/10.1016/j.neuron.2013.12.025>
- 3 Valla, L., Wentzel-Larsen, T., Hofoss, D., Slinning, K., 2015. Prevalence of suspected developmental  
4 delays in early infancy: results from a regional population-based longitudinal study. *BMC*  
5 *Pediatr.* 15, 215. <https://doi.org/10.1186/s12887-015-0528-z>
- 6 Vyazovskiy, V. V., Riedner, B.A., Cirelli, C., Tononi, G., 2007. Sleep homeostasis and cortical  
7 synchronization: II. A local field potential study of sleep slow waves in the rat. *Sleep* 30, 1631–  
8 42.
- 9 Wehrle, F.M., Lustenberger, C., Buchmann, A., Latal, B., Hagmann, C.F., O’Gorman, R.L., Huber, R.,  
10 2020. Multimodal assessment shows misalignment of structural and functional thalamocortical  
11 connectivity in children and adolescents born very preterm. *Neuroimage* 215, 116779.  
12 <https://doi.org/10.1016/j.neuroimage.2020.116779>
- 13 Woodward, N.D., Giraldo-Chica, M., Rogers, B., Cascio, C.J., 2017. Thalamocortical dysconnectivity  
14 in autism spectrum disorder: An analysis of the Autism Brain Imaging Data Exchange. *Biol.*  
15 *psychiatry. Cogn. Neurosci. neuroimaging* 2, 76–84. <https://doi.org/10.1016/j.bpsc.2016.09.002>  
16  
17  
18

## 1 Supplementary Material

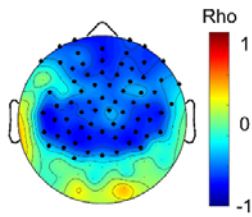

2

3 Suppl. Figure 1. Relationship between slow and fast spindle density. Topographical representation of  
4 Spearman correlation coefficients, values are color-coded and scaled to maximal (red) and minimal  
5 (blue) values. Significant electrodes are indicated with black dots ( $p < 0.05$ , statistical non-parametric  
6 cluster-corrected).

7

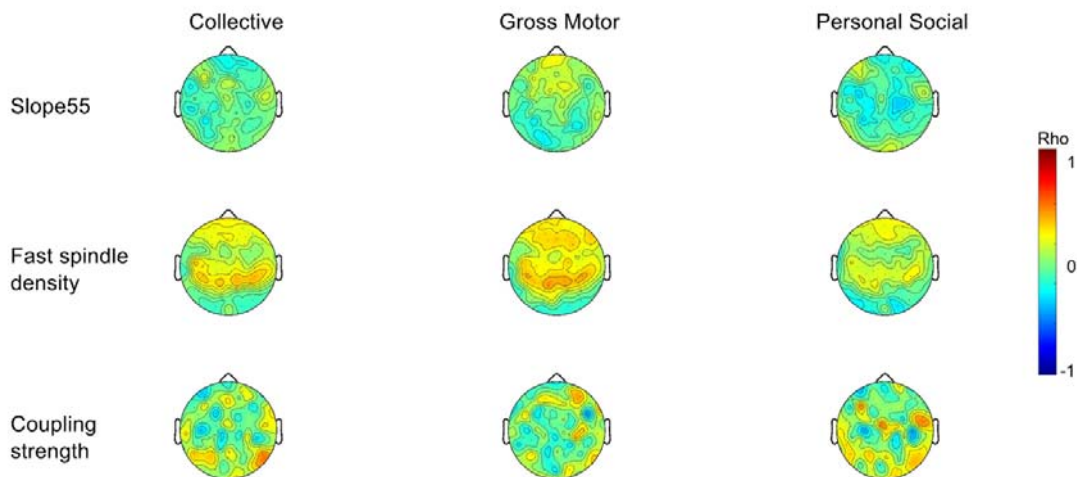

8

9 Suppl. Figure 2. EEG maps for concurrent infant behavioral development: Concurrent relationships  
10 between slope55, fast spindle density, slow wave-spindle coupling strength and behavioral  
11 developmental scores at age 6 months ( $N = 31$ ). Data are color-coded in topographical representation  
12 of Spearman correlation coefficients and scaled to maxima (red) and minima (blue). No significant  
13 associations were found ( $p < 0.05$ , statistical non-parametric cluster-corrected).

14

15

16

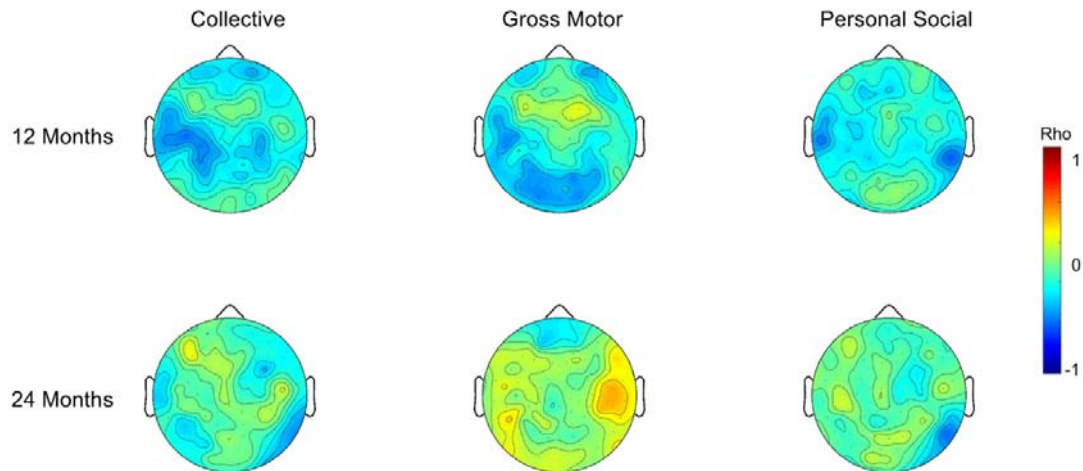

1

2 Suppl. Figure 3. EEG prediction maps for infant behavioral development: Predictive relationships  
3 between slope55 at age 6 months and behavioral developmental scores at age 12 (N = 22) and 24 (N  
4 = 27) months. Data are color-coded in topographical representation of Spearman correlation  
5 coefficients and scaled to maxima (red) and minima (blue). No significant associations were found (p  
6 < 0.05, statistical non-parametric cluster-corrected).

7

8

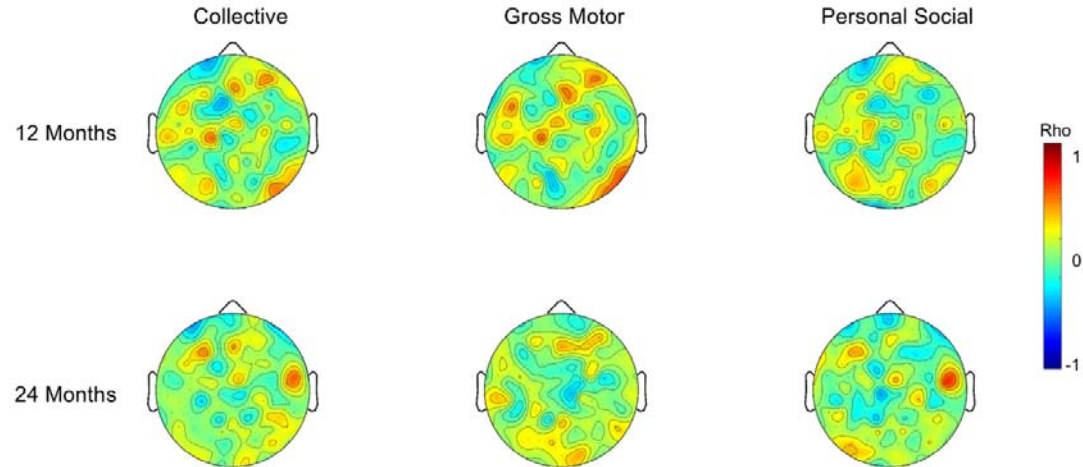

9

10 Suppl. Figure 4. EEG prediction maps for infant behavioral development: Predictive relationships  
11 between the slow wave-spindle coupling strength at age 6 months and behavioral developmental  
12 scores at age 12 (N = 22) and 24 (N = 27) months. Data are color-coded in topographical  
13 representation of Spearman correlation coefficients and scaled to maxima (red) and minima (blue). No  
14 significant associations were found (p < 0.05, statistical non-parametric cluster-corrected).

15

16

17

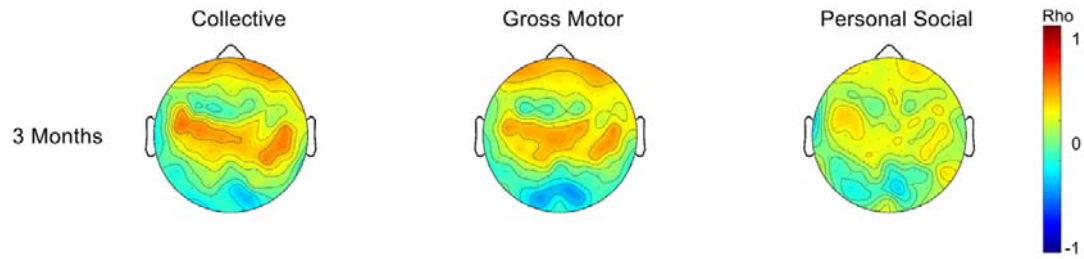

1  
2 Suppl. Figure 5. EEG reverse prediction maps for infant behavioral development: Reverse predictive  
3 relationships between the behavioral developmental scores at age 3 (N = 21) months and fast spindle  
4 density at age 6 months. Data are color-coded in topographical representation of Spearman  
5 correlation coefficients and scaled to maxima (red) and minima (blue). No significant associations  
6 were found ( $p < 0.05$ , statistical non-parametric cluster-corrected).
